# Supplementary material for: Psychometric properties of the Diabetes Self-Management Questionnaire (DSMQ) in Urdu
Source: PubMed Central journal article supplement (PMC5639758; doi:10.1186/s12955-017-0776-8), 2017-10-12
Supplement: 12955_2017_776_MOESM1_ESM.pdf [file 12955_2017_776_MOESM1_ESM.pdf]

## Diabetes Self-Management Questionnaire (DSMQ)

| The following statements describe self-care activities related to your diabetes. Thinking about your self-care over the <b>last 8 weeks</b> , please specify the extent to which each statement applies to you.                 | applies to me very much    | applies to me to a considerable degree | applies to me to some degree | does not apply to me       |
|---------------------------------------------------------------------------------------------------------------------------------------------------------------------------------------------------------------------------------|----------------------------|----------------------------------------|------------------------------|----------------------------|
| 1. I check my blood sugar levels with care and attention.<br><input type="checkbox"/> <i>Blood sugar measurement is not required as a part of my treatment.</i>                                                                 | <input type="checkbox"/> 3 | <input type="checkbox"/> 2             | <input type="checkbox"/> 1   | <input type="checkbox"/> 0 |
| 2. The food I choose to eat makes it easy to achieve optimal blood sugar levels.                                                                                                                                                | <input type="checkbox"/> 3 | <input type="checkbox"/> 2             | <input type="checkbox"/> 1   | <input type="checkbox"/> 0 |
| 3. I keep all doctors' appointments recommended for my diabetes treatment.                                                                                                                                                      | <input type="checkbox"/> 3 | <input type="checkbox"/> 2             | <input type="checkbox"/> 1   | <input type="checkbox"/> 0 |
| 4. I take my diabetes medication (e. g. insulin, tablets) as prescribed.<br><input type="checkbox"/> <i>Diabetes medication/insulin is not required as a part of my treatment.</i>                                              | <input type="checkbox"/> 3 | <input type="checkbox"/> 2             | <input type="checkbox"/> 1   | <input type="checkbox"/> 0 |
| 5. Occasionally I eat lots of sweets or other foods rich in carbohydrates.                                                                                                                                                      | <input type="checkbox"/> 3 | <input type="checkbox"/> 2             | <input type="checkbox"/> 1   | <input type="checkbox"/> 0 |
| 6. I record my blood sugar levels regularly (or analyse the value chart with my blood glucose meter).<br><input type="checkbox"/> <i>Blood sugar measurement is not required as a part of my treatment.</i>                     | <input type="checkbox"/> 3 | <input type="checkbox"/> 2             | <input type="checkbox"/> 1   | <input type="checkbox"/> 0 |
| 7. I tend to avoid diabetes-related doctors' appointments.                                                                                                                                                                      | <input type="checkbox"/> 3 | <input type="checkbox"/> 2             | <input type="checkbox"/> 1   | <input type="checkbox"/> 0 |
| 8. I do regular physical activity to achieve optimal blood sugar levels.                                                                                                                                                        | <input type="checkbox"/> 3 | <input type="checkbox"/> 2             | <input type="checkbox"/> 1   | <input type="checkbox"/> 0 |
| 9. I strictly follow the dietary recommendations given by my doctor or diabetes specialist.                                                                                                                                     | <input type="checkbox"/> 3 | <input type="checkbox"/> 2             | <input type="checkbox"/> 1   | <input type="checkbox"/> 0 |
| 10. I do not check my blood sugar levels frequently enough as would be required for achieving good blood glucose control.<br><input type="checkbox"/> <i>Blood sugar measurement is not required as a part of my treatment.</i> | <input type="checkbox"/> 3 | <input type="checkbox"/> 2             | <input type="checkbox"/> 1   | <input type="checkbox"/> 0 |
| 11. I avoid physical activity, although it would improve my diabetes.                                                                                                                                                           | <input type="checkbox"/> 3 | <input type="checkbox"/> 2             | <input type="checkbox"/> 1   | <input type="checkbox"/> 0 |
| 12. I tend to forget to take or skip my diabetes medication (e. g. insulin, tablets).<br><input type="checkbox"/> <i>Diabetes medication/insulin is not required as a part of my treatment.</i>                                 | <input type="checkbox"/> 3 | <input type="checkbox"/> 2             | <input type="checkbox"/> 1   | <input type="checkbox"/> 0 |
| 13. Sometimes I have real 'food binges' (not triggered by hypoglycaemia).                                                                                                                                                       | <input type="checkbox"/> 3 | <input type="checkbox"/> 2             | <input type="checkbox"/> 1   | <input type="checkbox"/> 0 |
| 14. Regarding my diabetes care, I should see my medical practitioner(s) more often.                                                                                                                                             | <input type="checkbox"/> 3 | <input type="checkbox"/> 2             | <input type="checkbox"/> 1   | <input type="checkbox"/> 0 |
| 15. I tend to skip planned physical activity.                                                                                                                                                                                   | <input type="checkbox"/> 3 | <input type="checkbox"/> 2             | <input type="checkbox"/> 1   | <input type="checkbox"/> 0 |
| 16. My diabetes self-care is poor.                                                                                                                                                                                              | <input type="checkbox"/> 3 | <input type="checkbox"/> 2             | <input type="checkbox"/> 1   | <input type="checkbox"/> 0 |
