# Supplementary material for: Psychometric properties of the Diabetes Self-Management Questionnaire (DSMQ) in Urdu
Source: PubMed Central journal article supplement (PMC5639758; doi:10.1186/s12955-017-0776-8), 2017-10-12
Supplement: 12955_2017_776_MOESM2_ESM.pdf [file 12955_2017_776_MOESM2_ESM.pdf]

## ذیابیطیس کی ذاتی دیکھ بھال کا سوالنامہ (DSMQ)

| مجھ پر لاگو ہوتا / ہوتی ہے |                            |                            |                            | مندرجہ ذیل بیانات آپ کی ذیابیطیس کی ذاتی دیکھ بھال کی سرگرمیوں کے متعلق ہیں۔ <b>گذشتہ آٹھ (8) ہفتوں تک</b> کی اپنی تمام ذاتی دیکھ بھال کے بارے میں سوچتے ہوئے، براہ مہربانی جو بیان آپ پر جس حد تک لاگو ہوتا ہو، اس کی نشاندہی کریں۔  |
|----------------------------|----------------------------|----------------------------|----------------------------|---------------------------------------------------------------------------------------------------------------------------------------------------------------------------------------------------------------------------------------|
| بالکل نہیں                 | کچھ حد تک                  | کافی حد تک                 | بہت زیادہ                  |                                                                                                                                                                                                                                       |
| <input type="checkbox"/> 0 | <input type="checkbox"/> 1 | <input type="checkbox"/> 2 | <input type="checkbox"/> 3 | 1 میں اپنے خون میں شوگر کی سطح کو توجہ اور احتیاط سے جانچنا / جانچتی ہوں۔<br><input type="checkbox"/> خون میں شوگر کی سطح کو جانچنا میرے علاج کے لیے ضروری نہیں ہے۔                                                                   |
| <input type="checkbox"/> 0 | <input type="checkbox"/> 1 | <input type="checkbox"/> 2 | <input type="checkbox"/> 3 | 2 خوراک کا انتخاب میرے خون میں شوگر کی سطح کا بہتر معیار حاصل کرنے میں آسانی پیدا کرتا / کرتی ہے۔                                                                                                                                     |
| <input type="checkbox"/> 0 | <input type="checkbox"/> 1 | <input type="checkbox"/> 2 | <input type="checkbox"/> 3 | 3 میں ڈاکٹروں سے اپنے ذیابیطیس کے علاج کے لیے تجویز کردہ ملاقاتوں (دن اور وقت) کے مطابق ملتا ہوں۔                                                                                                                                     |
| <input type="checkbox"/> 0 | <input type="checkbox"/> 1 | <input type="checkbox"/> 2 | <input type="checkbox"/> 3 | 4 میں اپنی ذیابیطیس کے لیے ہدایت کردہ ادویات (جیسے انسولین اور گولیاں وغیرہ) استعمال کرتا / کرتی ہوں۔<br><input type="checkbox"/> ذیابیطیس کی ادویات / انسولین میرے علاج کے لیے ضروری نہیں ہیں۔                                       |
| <input type="checkbox"/> 0 | <input type="checkbox"/> 1 | <input type="checkbox"/> 2 | <input type="checkbox"/> 3 | 5 کبھی کبھار میں بہت سی مٹھائیاں اور کثیر مقدار میں دوسری نشاستہ دار (کاربوہائیڈریٹ والی) خوراک کھاتا / کھاتی ہوں۔                                                                                                                    |
| <input type="checkbox"/> 0 | <input type="checkbox"/> 1 | <input type="checkbox"/> 2 | <input type="checkbox"/> 3 | 6 میں اپنے خون میں شوگر کی سطح کو باقاعدگی سے نوٹ کرتا / کرتی ہوں۔<br><input type="checkbox"/> خون میں شوگر کی سطح کو جانچنا میرے علاج کے لیے ضروری نہیں ہے۔                                                                          |
| <input type="checkbox"/> 0 | <input type="checkbox"/> 1 | <input type="checkbox"/> 2 | <input type="checkbox"/> 3 | 7 میں ذیابیطیس کے متعلق ڈاکٹروں کی تجویز کردہ ملاقاتوں (دن اور وقت) کو نظر انداز کرتا / کرتی ہوں۔                                                                                                                                     |
| <input type="checkbox"/> 0 | <input type="checkbox"/> 1 | <input type="checkbox"/> 2 | <input type="checkbox"/> 3 | 8 میں خون میں شوگر کی بہتر سطح کو حاصل کرنے کے لیے باقاعدگی سے جسمانی سرگرمی کرتا / کرتی ہوں۔                                                                                                                                         |
| <input type="checkbox"/> 0 | <input type="checkbox"/> 1 | <input type="checkbox"/> 2 | <input type="checkbox"/> 3 | 9 میں ڈاکٹروں یا ماہر ذیابیطیس کی دی گئی غذائی تجاویز پر سختی سے عمل کرتا / کرتی ہوں۔                                                                                                                                                 |
| <input type="checkbox"/> 0 | <input type="checkbox"/> 1 | <input type="checkbox"/> 2 | <input type="checkbox"/> 3 | 10 میں اپنے خون میں شوگر کی سطح کو اتنا متواتر چیک نہیں کرتا / کرتی، جتنا کہ خون میں گلوکوز کی مناسب سطح کو حاصل کرنے کے لیے ضروری ہوتا ہے۔<br><input type="checkbox"/> خون میں شوگر کی سطح کو جانچنا میرے علاج کے لیے ضروری نہیں ہے۔ |
| <input type="checkbox"/> 0 | <input type="checkbox"/> 1 | <input type="checkbox"/> 2 | <input type="checkbox"/> 3 | 11 میں جسمانی سرگرمی کو نظر انداز کرتا / کرتی ہوں، حالانکہ یہ میری ذیابیطیس کے کنٹرول کو بہتر بنا تی ہے۔                                                                                                                              |
| <input type="checkbox"/> 0 | <input type="checkbox"/> 1 | <input type="checkbox"/> 2 | <input type="checkbox"/> 3 | 12 میں ذیابیطیس کی ادویات چھوڑ دینا / دیتی یا لینا بھول جاتا / جاتی ہوں۔<br><input type="checkbox"/> ذیابیطیس کی ادویات / انسولین میرے علاج کے لیے ضروری نہیں ہیں۔                                                                    |
| <input type="checkbox"/> 0 | <input type="checkbox"/> 1 | <input type="checkbox"/> 2 | <input type="checkbox"/> 3 | 13 بعض اوقات مجھے بہت زیادہ بھوک محسوس ہوتی ہے۔ (جو کہ خون میں شوگر کی سطح کی کمی کی وجہ سے نہیں ہے)                                                                                                                                  |
| <input type="checkbox"/> 0 | <input type="checkbox"/> 1 | <input type="checkbox"/> 2 | <input type="checkbox"/> 3 | 14 مجھے اپنی ذیابیطیس کی دیکھ بھال کے متعلق اپنے ڈاکٹروں کے پاس کثرت سے جانا چاہئے۔                                                                                                                                                   |
| <input type="checkbox"/> 0 | <input type="checkbox"/> 1 | <input type="checkbox"/> 2 | <input type="checkbox"/> 3 | 15 میں اپنی طے شدہ جسمانی سرگرمیاں چھوڑ دیا کرتا / کرتی ہوں۔                                                                                                                                                                          |
| <input type="checkbox"/> 0 | <input type="checkbox"/> 1 | <input type="checkbox"/> 2 | <input type="checkbox"/> 3 | 16 میری ذیابیطیس کی ذاتی دیکھ بھال بہت بری ہے۔                                                                                                                                                                                        |

Translated and Adapted by Allah Bukhsh & Tahir Mehmood Khan (allah.bukhsh@monash.edu, tahir.mehmood@monash.edu)

School of Pharmacy, MONASH University, Malaysia, 2016

© Dr Andreas Schmitt, Research Institute of the Diabetes Academy Mergentheim, Germany, 2012
